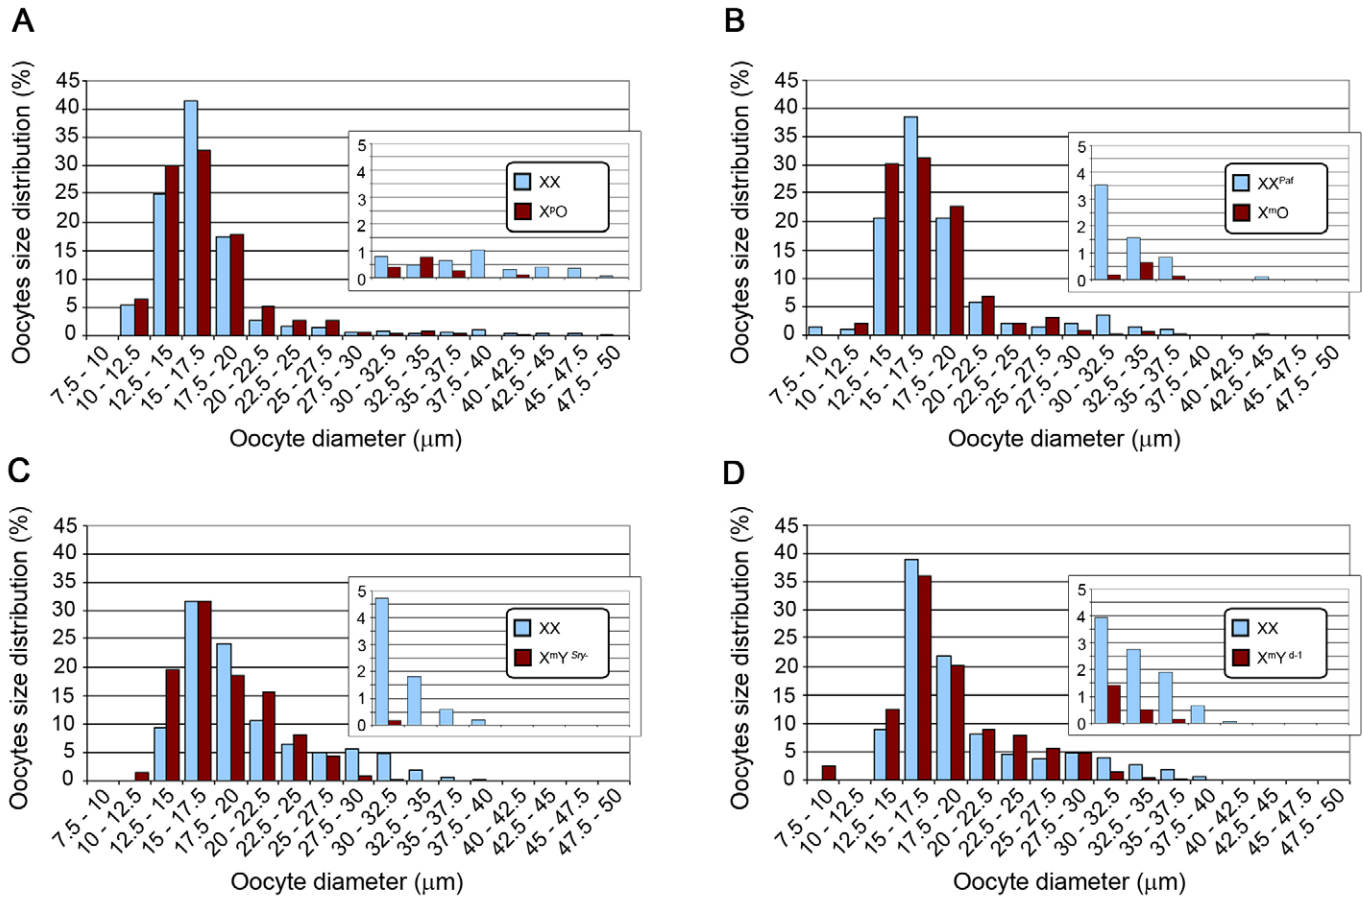

**Fig. S1. Oocyte size distributions at 5 dpp comparing single X genotypes with XX from the respective crosses.**

$X^p$ , paternal X;  $X^m$ , maternal X; inset shows the distribution of 3050 mm diameter oocytes with a magnified scale. Oocyte size data were collected during the ‘distributed point count’ procedure (see Materials and Methods). Throughout this procedure, whenever a ‘hit’ occurred on an oocyte that was judged to have been sectioned through the middle an outline of the oocyte was ‘drawn’ using a computer mouse and the number of pixels was obtained. Areas of oocytes were determined based on the number of pixels per square for a grid of known area ‘drawn’ at the same magnification. The cross-sectional areas were then used to generate a frequency distribution of oocyte diameters as previously described (Burgoyne and Baker, 1985).

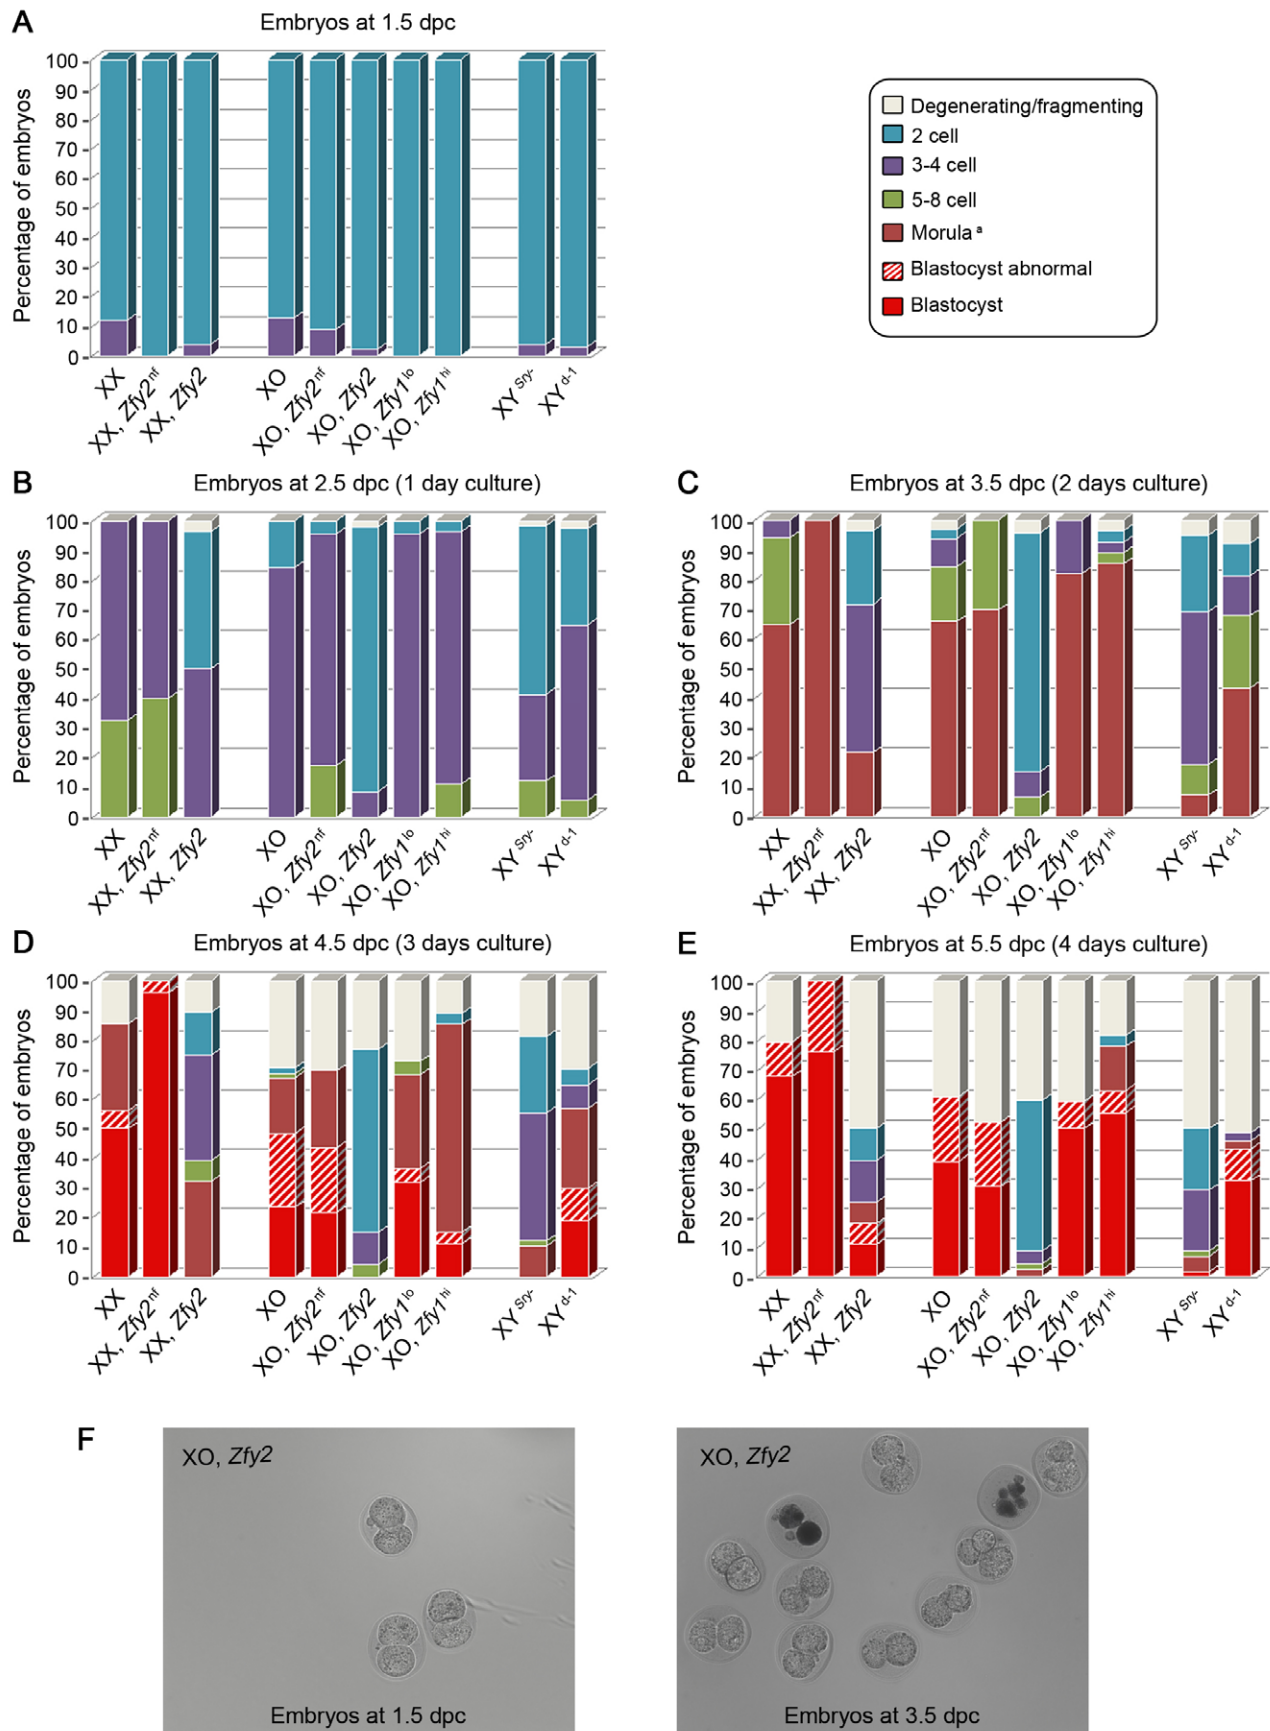

**Fig. S2. Embryo development in culture scored daily from 1.55.5 dpc.**

(A-E) Percentage of embryos by stage of development after 0, 1, 2, 3 and 4 days of culture. (F) Confirmation of visual viability assessments by dye exclusion tests. 2-cell embryos from  $XO, Zfy2$  at 1.5dpc exclude trypan blue, as do 2-cell embryos scored as viable after two days of culture (3.5dpc). However, embryos scored as dead or fragmenting are strongly stained with trypan blue.

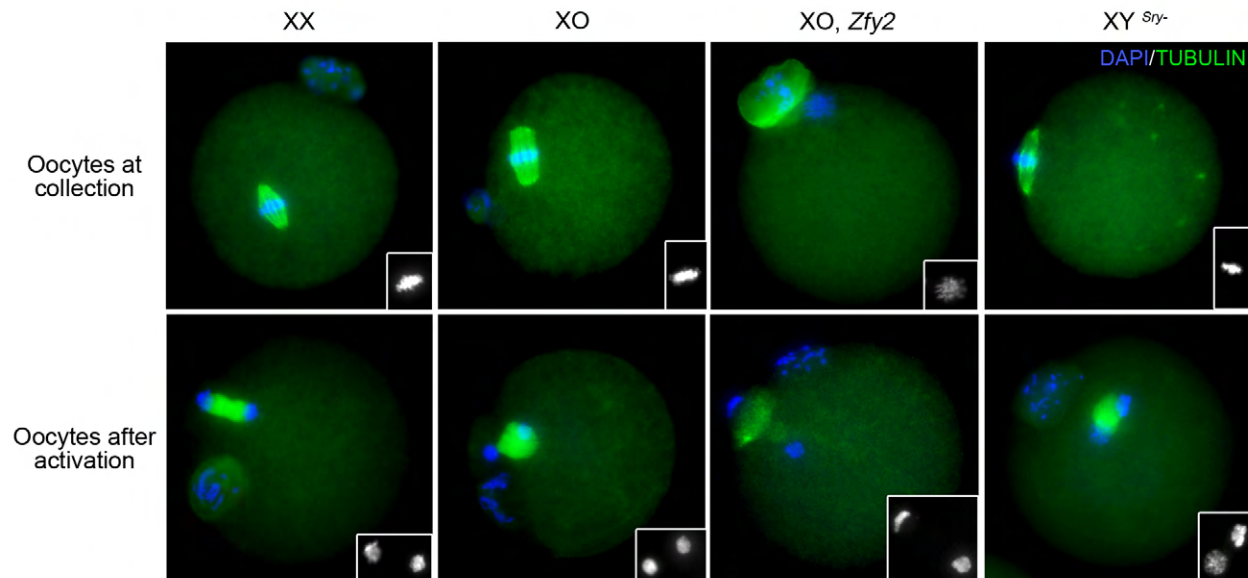

**Fig. S3. Abnormal chromatin and spindle features at meiosis-2 in *Zfy2* carriers.**

Chromatin is stained blue with DAPI (insets provide a black and white image), and tubulin (and thus the spindle) is stained green. (A) Examples of oocytes fixed and stained at collection. As expected, **XX** and **XO** have intact 1<sup>st</sup> polar bodies with characteristic multiple condensed small chromatin masses, and a well-organised MII spindle and metaphase plate in the oocyte. **XO,*Zfy2*** has a strongly tubulin positive 1<sup>st</sup> polar body suggesting it has attempted to divide, but has no organised spindle or metaphase plate (likely a consequence of polar body death). There is no clear spindle associated with the oocyte chromatin (all the *XO,*Zfy2** oocytes were scored as having a faint or undetectable spindle - Table S2). **XY<sup>Sry-</sup>** has no visible polar body but there is a well organised spindle and metaphase plate in the oocyte. Only 56% of XY<sup>Sry-</sup> oocytes at collection had a clear well-organised spindle. (B) Examples of oocytes fixed and stained after activation. **XX**, **XO** and **XO,*Zfy2*** each have a 1<sup>st</sup> polar body and are at anaphase/telophase II, with the oocyte chromatin having separated into two masses with one mass moving into the forming 2<sup>nd</sup> polar body. 100% of XX oocytes, 50% of XO oocytes, and 76% of *XO,*Zfy2** (and XY<sup>Sry-</sup>) oocytes reached this stage (Fig. 7F). **XY<sup>Sry-</sup>** has a 1<sup>st</sup> polar body and the oocyte chromatin has separated into two masses. However, the lower of the two masses has precociously decondensed. Precocious decondensation is a prevalent feature in *Zfy2* carriers (Fig. 7F).

**Table S1. Analysis of variance of oocyte data relevant to the single X genotype comparisons**

**A. Identification of a major maternal effect on oocyte pool size of their daughters**

**Analysis of Variance Table for oocyte pool**

| Source           | DF | Sum of Squares | Mean Square | F-Ratio | Prob Level |
|------------------|----|----------------|-------------|---------|------------|
| A: Cross         | 2  | 3883733        | 1941866     | 0.42    | 0.671468   |
| B(A): XX mother  | 9  | 4.196655E+07   | 4662950     | 4.95    | 0.006168*  |
| S                | 12 | 1.131344E+07   | 942786.7    |         |            |
| Total (Adjusted) | 23 | 5.716372E+07   |             |         |            |
| Total            | 24 |                |             |         |            |

This ANOVA analysis shows that XX mothers from different crosses are equivalent but there are major differences between mothers irrespective of cross. Since each mother provided only one litter, the maternal effect may be a litter effect.

**B. Identification of a reduced oocyte pool in XY<sup>Sry-</sup> females at 5dpp**

**Analysis of Variance Table for oocyte pool**

| Source           | DF | Sum of Squares | Mean Square | F-Ratio | Prob Level |
|------------------|----|----------------|-------------|---------|------------|
| A: Genotype      | 2  | 0.2276341      | 0.1138171   | 4.55    | 0.026177*  |
| S                | 17 | 0.4254298      | 0.02502528  |         |            |
| Total (Adjusted) | 19 | 0.653064       |             |         |            |
| Total            | 20 |                |             |         |            |

**Planned Comparison: XY<sup>Sry-</sup> vs. XO (P=0.0078)**

| Group              | Females | Mean   | Comparison SE |
|--------------------|---------|--------|---------------|
| XY <sup>Sry-</sup> | 8       | 0.4976 | 0.0902        |
| XO                 | 5       | 0.7695 |               |

**Planned Comparison: XY<sup>Sry-</sup> vs. XY<sup>d-1</sup> (P=0.1975, NS)**

| Group              | Females | Mean   | Comparison SE |
|--------------------|---------|--------|---------------|
| XY <sup>Sry-</sup> | 8       | 0.4976 | 0.0819        |
| XY <sup>d-1</sup>  | 7       | 0.6074 |               |

This ANOVA analysis was carried out using the oocyte counts of the single X genotypes expressed as a ratio to the mean value for their XX siblings, thus compensating for the maternal effect identified in A. The analysis shows a significant effect of genotype on the size of the oocyte pool at 5dpp, and the planned comparisons reveal that this is due to a significant reduction in the pool size of XY<sup>Sry-</sup> females relative to XO females.

**C. Single X genotype comparisons at 28dpp**

**Analysis of Variance Table for oocyte pool**

| Source           | DF | Sum of Squares | Mean Square | F-Ratio | Prob Level    |
|------------------|----|----------------|-------------|---------|---------------|
| A: Genotype      | 2  | 0.05977543     | 0.02988772  | 0.98    | 0.391923 (NS) |
| S                | 21 | 0.6406197      | 0.0305057   |         |               |
| Total (Adjusted) | 23 | 0.7003952      |             |         |               |
| Total            | 24 |                |             |         |               |

**Planned Comparison: XY<sup>Sry-</sup> vs. XO (P=0.3979, NS)**

| Group              | Females | Mean   | Comparison SE |
|--------------------|---------|--------|---------------|
| XY <sup>Sry-</sup> | 8       | 0.3877 | 0.0873        |
| XO                 | 8       | 0.4631 |               |

**Planned Comparison: XY<sup>Sry-</sup> vs. XY<sup>d-1</sup> (P=0.1803, NS)**

| Group              | Females | Mean   | Comparison SE |
|--------------------|---------|--------|---------------|
| XY <sup>Sry-</sup> | 8       | 0.3877 | 0.0873        |
| XY <sup>d-1</sup>  | 8       | 0.5088 |               |

**Analysis of Variance Table for growing oocytes**

| Source           | DF | Sum of Squares | Mean Square | F-Ratio | Prob Level    |
|------------------|----|----------------|-------------|---------|---------------|
| A: Genotype      | 2  | 0.02149437     | 0.01074719  | 0.24    | 0.785466 (NS) |
| S                | 21 | 0.9239169      | 0.04399604  |         |               |
| Total (Adjusted) | 23 | 0.9454113      |             |         |               |
| Total            | 24 |                |             |         |               |

**Planned Comparison: XY<sup>Sry-</sup> vs. XO (P=0.8014, NS)**

| Group              | Females | Mean   | Comparison SE |
|--------------------|---------|--------|---------------|
| XY <sup>Sry-</sup> | 8       | 0.7247 | 0.1049        |
| XO                 | 8       | 0.6980 |               |

**Planned Comparison: XY<sup>Sry-</sup> vs. XY<sup>d-1</sup> (P=0.4971, NS)**

| Group              | Females | Mean   | Comparison SE |
|--------------------|---------|--------|---------------|
| XY <sup>Sry-</sup> | 8       | 0.7247 | 0.1049        |
| XY <sup>d-1</sup>  | 8       | 0.6522 |               |

There are no significant differences between the single X genotypes at 28dpp.

**D. XY<sup>Sry-</sup> vs. XY<sup>d-1</sup> comparisons at 35-56dpp****Analysis of Variance Table for oocyte pool**

| Source           | DF | Sum of Squares | Mean Square | F-Ratio | Prob Level |
|------------------|----|----------------|-------------|---------|------------|
| A: Genotype      | 1  | 0.03149262     | 0.03149262  | 3.29    | 0.099572   |
| S                | 10 | 0.09559035     | 0.009559034 |         |            |
| Total (Adjusted) | 11 | 0.127083       |             |         |            |
| Total            | 12 |                |             |         |            |

**Comparison: XY<sup>Sry-</sup> vs. XY<sup>d-1</sup> (P=0.0996, NS)**

| Group              | Females | Mean      | Comparison SE |
|--------------------|---------|-----------|---------------|
| XY <sup>Sry-</sup> | 6       | 0.1997218 | 0.0564        |
| XY <sup>d-1</sup>  | 6       | 0.3021793 |               |

**Analysis of Variance Table for growing oocytes**

| Source           | DF | Sum of Squares | Mean Square | F-Ratio | Prob Level |
|------------------|----|----------------|-------------|---------|------------|
| A: Genotype      | 1  | 0.02241009     | 0.02241009  | 0.34    | 0.571028   |
| S                | 10 | 0.6531672      | 0.06531672  |         |            |
| Total (Adjusted) | 11 | 0.6755773      |             |         |            |
| Total            | 12 |                |             |         |            |

**Comparison: XY<sup>Sry-</sup> vs. XY<sup>d-1</sup> (P=0.5710, NS)**

| Group              | Females | Mean      | Comparison SE |
|--------------------|---------|-----------|---------------|
| XY <sup>Sry-</sup> | 6       | 0.5716591 | 0.1476        |
| XY <sup>d-1</sup>  | 6       | 0.6580885 |               |

There are no significant differences between XY<sup>Sry-</sup> and XY<sup>d-1</sup> at 35-56dpp

**Table S2. Zfy2-dependent abnormalities originating before the 2-cell stage.**

**Table S2A. Polar body counts from photographs such as those in Fig. 7A.**

| Mouse                 | Number of 2-cell embryos |            |            | Notes                                                                     |
|-----------------------|--------------------------|------------|------------|---------------------------------------------------------------------------|
|                       | 0 PB                     | 1 PB       | 2-3 PB     |                                                                           |
| XO #1                 | 0                        | 4          | 7          | The two blastomeres of the embryos were of normal shape and even in size. |
| XO #2                 | 0                        | 6          | 7          |                                                                           |
| XO # 3                | 0                        | 5          | 5          |                                                                           |
| XO # 4                | 0                        | 4          | 4          |                                                                           |
| Totals                | 0                        | 19         | 23         |                                                                           |
| <b>Percentages</b>    | <b>0%</b>                | <b>45%</b> | <b>55%</b> |                                                                           |
| XO, Zfy2 #1           | 8                        | 6          | 1          | Blastomeres and polar bodies often very aberrant in size and shape.       |
| XO, Zfy2 #2           | 8                        | 3          | 3          |                                                                           |
| XO, Zfy2 #3           | 4                        | 4          | 1          |                                                                           |
| Totals                | 20                       | 13         | 5          |                                                                           |
| <b>Percentages</b>    | <b>53%</b>               | <b>34%</b> | <b>13%</b> |                                                                           |
| XY <sup>Sry-</sup> #1 | 2                        | 5          | 1          | Blastomeres often not of the same size and somewhat misshapen.            |
| XY <sup>Sry-</sup> #2 | 11                       | 2          | 1          |                                                                           |
| XY <sup>Sry-</sup> #3 | 4                        | 4          | 0          |                                                                           |
| Totals                | 17                       | 11         | 2          |                                                                           |
| <b>Percentages</b>    | <b>57%</b>               | <b>37%</b> | <b>6%</b>  |                                                                           |

**Table S2B. Polar body and blastomere nuclei data from DAPI-stained 1.5 dpc 2-cell embryos.**

| Mouse                  | Polar Body count |              |              | Blastomere nuclei |              |             |
|------------------------|------------------|--------------|--------------|-------------------|--------------|-------------|
|                        | 0                | 1            | 2/3          | Central           | Eccentric    | Multiple    |
| XO (1)                 | 0                | 6            | 4            | 19                | 1            | 0           |
| XO (2)                 | 0                | 5            | 2            | 10                | 4            | 0           |
| XO (3)                 | 0                | 4            | 3            | 11                | 3            | 0           |
| Totals                 | 0                | 15           | 9            | 40                | 8            | 0           |
| <b>Percentages</b>     | <b>0.0%</b>      | <b>62.5%</b> | <b>37.5%</b> | <b>83.3%</b>      | <b>16.7%</b> | <b>0.0%</b> |
| XO,Zfy2 (1)            | 9                | 3            | 1            | 15                | 10           | 1           |
| XO,Zfy2 (2)            | 9                | 3            | 1            | 9                 | 15           | 1           |
| Totals                 | 18               | 6            | 2            | 24                | 25           | 2           |
| <b>Percentages</b>     | <b>69.2%</b>     | <b>23.1%</b> | <b>7.7%</b>  | <b>47.1%</b>      | <b>49.0%</b> | <b>3.9%</b> |
| XY <sup>Sry-</sup> (1) | 3                | 6            | 0            | 9                 | 7            | 2           |
| XY <sup>Sry-</sup> (2) | 8                | 7            | 0            | 13                | 15           | 2           |
| Totals                 | 11               | 13           | 0            | 22                | 22           | 4           |
| <b>Percentages</b>     | <b>45.8%</b>     | <b>54.2%</b> | <b>0.0%</b>  | <b>45.8%</b>      | <b>45.8%</b> | <b>8.3%</b> |

**Table S2C. Meiotic stage assessed when oocytes collected**

| Mouse                 | Number of oocytes collected (females used) | Percentages of oocytes by stage* |                     |
|-----------------------|--------------------------------------------|----------------------------------|---------------------|
|                       |                                            | MII                              | Not MII / faint MII |
| XX                    | 17 (3)                                     | 100.0                            | 0.0                 |
| XX,Zfy2 <sup>nf</sup> | 14 (4)                                     | 71.4                             | 28.6                |
| XX,Zfy2               | 17 (4)                                     | 70.6                             | 29.4                |
| XO                    | 11 (3)                                     | 54.5                             | 45.5                |
| XO,Zfy2               | 16 (4)                                     | 0.0                              | 100.0               |
| XY <sup>Sry-</sup>    | 18 (4)                                     | 55.6                             | 44.4                |

\* The stage classification is based on the degree of spindle organisation: MII = complete, 'faint' MII is incomplete, and 'Not MII' is no spindle (also see Fig. S3).

**Table S3. List of genes significantly regulated by *Zfy2* in GVocytes.**

- Tab1: 2655 genes found to be regulated by the functional *Zfy2* transgene in XX oocytes (batch 2) when compared to XX wild type.
- Tab2: 359 genes significantly regulated in XX,*Zfy2* and where the fold change was double that for any control genotype or batch effect.
- Tab3: Scatter plot comparison between Batch 1 XX,*Eif2s3y*,*Zfy2* and Batch 2 XX,*Zfy2* samples.
- Tab3: Clustering analysis using DAVID
- Tab4: Genes showing concordant regulation in both XX,*Zfy2* and XY<sup>dom</sup> relative to XX control.

[Download Table S3](#)

**Table S4. List of primers used for semi-quantitative and quantitative RT-PCR.**

| Gene                       | Primer ID                                              | Primer sequence                                    | Annealing Temp | Amplicon size | References                  |
|----------------------------|--------------------------------------------------------|----------------------------------------------------|----------------|---------------|-----------------------------|
| <b>Primers for RT-PCR</b>  |                                                        |                                                    |                |               |                             |
| <i>Zfy1</i>                | <i>Zfy1</i> -F<br><i>Zfy1</i> -R                       | GCCAGTGCTCTCTTAAACCAA<br>TGAGTACACAAAGTCCCAGCA     | 60°C           | 386bp         | (Vernet et al., 2011)       |
| <i>Ubal1y</i>              | <i>Ubal1y</i> -FP1<br><i>Ubal1y</i> -R                 | CGACAGCAACTTTCACATGG<br>GAGCCAGAGGTGCAGAAAAG       | 60°C           | 226bp         | (Royo et al., 2010)         |
| <i>Smcy/Kdm5d</i>          | o96- <i>Smcy</i> 1F<br>o97- <i>Smcy</i> 1R             | GGATGAACTGCCTGCTATGCT<br>CAATCGCTGAAGCAGCTCAC      | 60°C           | 187bp         | Current paper               |
| <i>Eif2s3y</i>             | <i>Eif2s3y</i> -F1<br><i>Eif2s3y</i> -R1               | CCAGGGACCAAAGGAAACTT<br>TAGCCTGGCTTTCTTTCCACC      | 60°C           | 250bp         | Current paper               |
| <i>Uty</i>                 | o50 <i>Uty</i> -F<br>o51 <i>Uty</i> -R                 | ACCTGAAGATTATTGGGGTG<br>CCAAATCACCAGGTCGTTGA       | 60°C           | 146bp         | Current paper               |
| <i>Dby/Ddx3y</i>           | o46 <i>Ddx3y</i> -F<br>o47 <i>Ddx3y</i> -R             | GTATGGCTTATGAACACCAC<br>CATTTGCAGAACCCTGCTC        | 60°C           | 111bp         | Current paper               |
| <i>Usp9y</i>               | o42 <i>Usp9y</i> F<br>o43 <i>Usp9y</i> R               | GGGAAGTTTCTGAACATGGG<br>GGTCCTTCATCCAAAGACAC       | 60°C           | 145bp         | Current paper               |
| <i>Zfy2</i> Germ cell      | <i>Zfy2</i> -F<br><i>Zfy2</i> -R                       | GCCAGTGCTATGTTACACCAT<br>TCTGTATGCATTGTCCCAGCA     | 60°C           | 386bp         | (Vernet et al., 2011)       |
| <i>Zfy2</i> Spermatid      | o2696- <i>Zfy2</i> ex1a F<br>o4018- <i>Zfy2</i> ex5 R  | CTGTTGTGGTTCTCGTAGCAG<br>CTATTCCATCAAATAACGAC      | 58°C           | 192bp         | (Decarpentrie et al., 2012) |
| <i>H2al2y</i>              | <i>H2Al2y</i> -FP<br><i>H2Al2y</i> -RP                 | CCGTGTAGATCGTTTCCTTG<br>AGAGTTGGTGGAGCTGTTCC       | 60°C           | 206bp         | Current paper               |
| <i>Rbmy</i>                | <i>Rbmy</i> -F<br><i>Rbmy</i> -R                       | GCGTCTTCCAGAAGAGATGAGT<br>GAGTGGTAATTGCCATAGTCACAG | 60°C           | 113bp         | (Ellis et al., 2005)        |
| <i>Dazl</i>                | <i>Dazl</i> -F<br><i>Dazl</i> -R                       | CCTCCAACCATGATGAATCC<br>TGAACATTCATTGGGCAAAA       | 60°C           | 234bp         | (Vernet et al., 2011)       |
| $\beta$ -actin             | $\beta$ -actin-F<br>$\beta$ -actin-R                   | GGCACCACACCTTCTACAATG<br>GTGGTGGTGAAGCTGTAGCC      | 60°C           | 352bp         | Current paper               |
| <b>Primers for qRT-PCR</b> |                                                        |                                                    |                |               |                             |
| <i>Zfy1</i> total          | o4047- <i>Zfy1</i> ex8 F<br>o4048- <i>Zfy1</i> ex10 R  | AAGTCACAGATCAGAGCACT<br>CTCATCTTGGTTTAAGAGAGCA     | 58°C           | 278bp         | (Decarpentrie et al., 2012) |
| <i>Zfy1</i> with exon6     | o2836- <i>Zfy1</i> ex5 F<br>o2714- <i>Zfy1</i> ex6 R   | AAGAACTGAAGCCATGGATG<br>TACTTCCACAACAATCTGGTCAC    | 60°C           | 132bp         | (Decarpentrie et al., 2012) |
| <i>Zfy1</i> without exon6  | o2832- <i>Zfy1</i> ex5/7 F<br>o2833- <i>Zfy1</i> ex8 R | GATGGAATAGTGGATGAACC<br>CATTGCCATTTTGGTCTCACTC     | 60°C           | 205bp         | (Decarpentrie et al., 2012) |
| <i>Zfy2</i> total          | o54- <i>Zfy2</i> ex7 F<br>o55- <i>Zfy2</i> ex8 R       | GGATGAGCCTAGCAAAACAG<br>CATTGCCATTGTCGGTCTCAC      | 60°C           | 194bp         | Current paper               |
| <i>Zfy2</i> total          | o2985- <i>Zfy2</i> ex10 R<br>o2986- <i>Zfy2</i> ex7 F  | CTGGCAGTGGCATTCTGCAC<br>GAGCCTAGCAAAACAGATCATG     | 60°C           | 452bp         | Current paper               |

**References:**

- Decarpentrie, F., Vernet, N., Mahadevaiah, S.K., Longepied, G., Streichemberger, E., Aknin-Seifer, I., Ojarikre, O.A., Burgoyne, P.S., Metzler-Guillemain, C., and Mitchell, M.J. (2012). Human and mouse ZFY genes produce a conserved testis-specific transcript encoding a zinc finger protein with a short acidic domain and modified transactivation potential. *Hum Mol Genet* 21, 2631-2645.
- Ellis, P.J.I., Clemente, E.J., Ball, P., Toure, A., Ferguson, L., Turner, J.M.A., Loveland, K.L., Affara, N.A., and Burgoyne, P.S. (2005). Deletions on mouse Yq lead to upregulation of multiple X- and Y-linked transcripts in spermatids. *Hum Mol Gen* 14, 2705-2715.
- Garcia, M.A., Collado, M., Munoz-Fontela, C., Matheu, A., Marcos-Villar, L., Arroyo, J., Esteban, M., Serrano, M., and Rivas, C. (2006). Antiviral action of the tumor suppressor ARF. *EMBO J* 25, 4284-4292.
- Royo, H., Polikiewicz, G., Mahadevaiah, S.K., Prosser, H., Mitchell, M., Bradley, A., de Rooij, D.G., Burgoyne, P.S., and Turner, J.M. (2010). Evidence that meiotic sex chromosome inactivation is essential for male fertility. *Curr Biol* 20, 2117-2123.
- Vernet, N., Mahadevaiah, S.K., Ojarikre, O.A., Longepied, G., Prosser, H.M., Bradley, A., Mitchell, M.J., and Burgoyne, P.S. (2011). The Y-encoded gene *Zfy2* acts to remove cells with unpaired chromosomes at the first meiotic metaphase in male mice. *Curr Biol* 21, 787-793.
